# Supplementary material for: Efficient solution-processed small-molecule solar cells by insertion of graphene quantum dots
Source: Royal Society of Chemistry journal article supplement (doi:10.1039/c4nr04944f), 2014-01-01
Supplement: c4nr04944f1.pdf [file c4nr04944f1.pdf]

## Supplementary Information

### **Efficient Solution-Processed Small-Molecule Solar Cells by Insertion of Graphene Quantum Dots**

**Dong Hwan Wang<sup>a,\*</sup>, Jung Kyu Kim<sup>b</sup>, Jong Hyeok Park<sup>b</sup>**

<sup>a</sup> School of Integrative Engineering, Chung-Ang University, 84 Heukseok-ro, Dongjak-gu, Seoul 156-756, Republic of Korea; E-mail: king0401@cau.ac.kr

<sup>b</sup> School of Chemical Engineering and SAINT, Sungkyunkwan University, Suwon 440-746, Republic of Korea

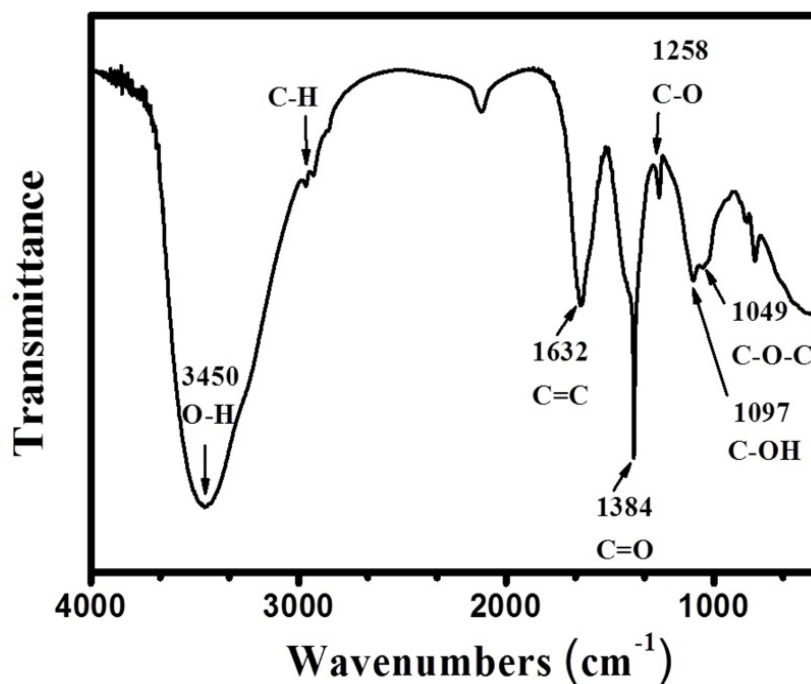

Figure S1. Fourier transform infrared spectroscopy (FT-IR) of GQDs

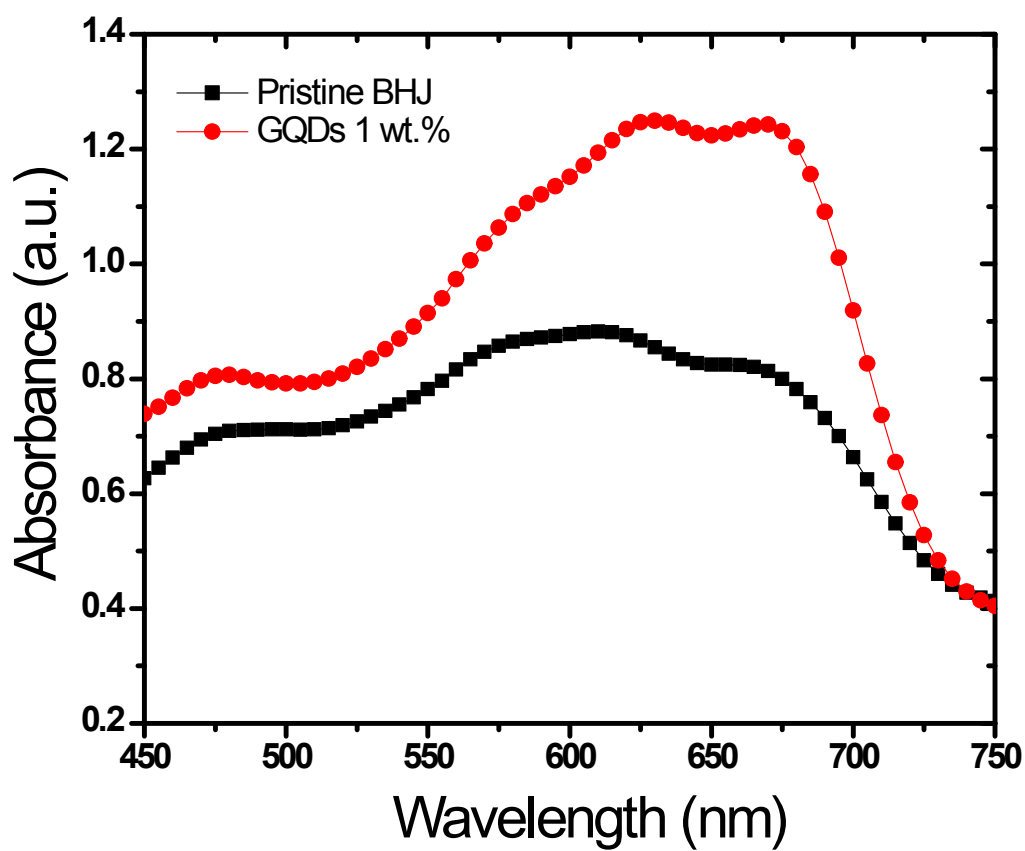

Figure S2. UV/Vis absorption spectra of the small molecule BHJ film without (pristine) and with GQDs (1 wt. %). GQDs inserted BHJ exhibits improved UV/Vis absorption property.

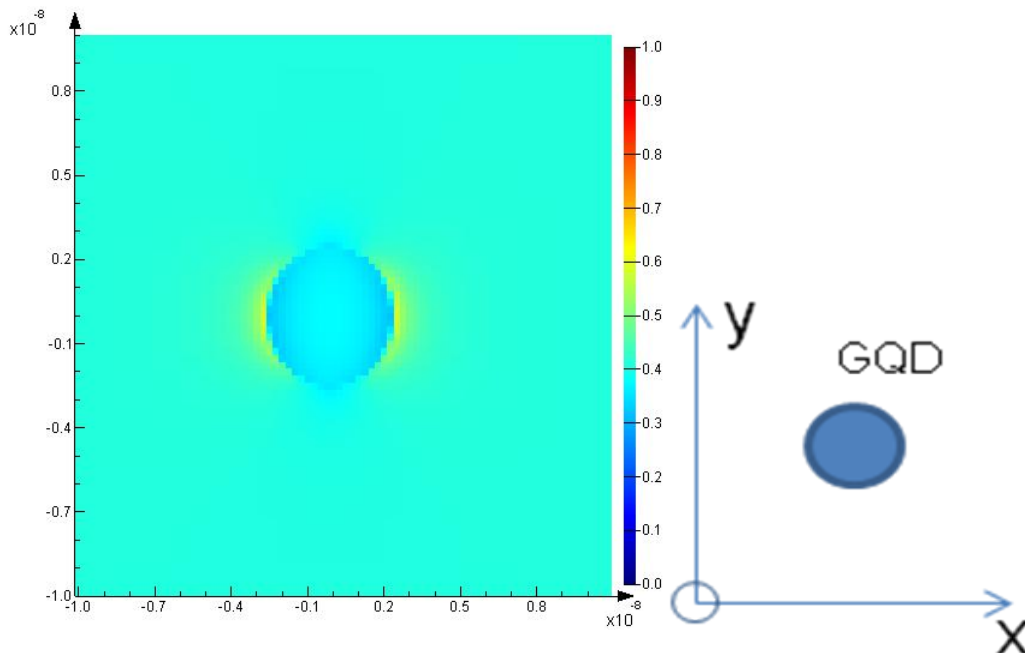

Figure S3. Optical simulation of E-field intensity distribution of GQD obtained by finite difference time domain (FDTD) analysis at the wavelength of 500 nm in thin film. For nanoparticles, the simulation region in the  $x$ ,  $y$ , and  $z$  directions are all non-periodic. The Perfect Matched Layer (PML) boundary condition is used in the  $x$ ,  $y$ , and  $z$  directions. The Total Field Scattered Field (TFSF) light source is used for single nanoparticle e-field simulations. The mesh size is set at 0.2 nm in order to obtain an accurate field distribution. A three-dimensional (3D) power monitor is used to obtain the E-field information for wavelengths at 500 nm. The  $n$  and  $k$  values of GQDs should satisfy the condition whereby  $n^2 - k^2 < 0$ ; if  $n^2 - k^2 > 0$ , then the properties of the GQD are not metallic, and no plasmonic effect will occur. It is clearly shown in Fig. S3 that if no plasmonic effect occurs, the GQDs act similarly to a dielectric material.
